# Supplementary material for: Bird-window collisions: different fall and winter risk and protective factors
Source: PeerJ. 2020 Jun 19;8:e9401. doi: 10.7717/peerj.9401 (PMC7307557; doi:10.7717/peerj.9401)
Supplement: Supplemental Information 1 [file peerj-08-9401-s001.xlsx]

## Sheet: SupFile1
StrikeSum	Pear	Mirror	GoodWin	season	Bldg1to8	ObDay
0	1	1	0	0	1	0
0	1	1	0	0	1	1
0	1	1	0	0	1	2
0	1	1	0	0	1	3
0	1	1	0	0	1	4
0	1	1	0	0	1	5
0	1	1	0	0	1	6
0	1	1	0	0	1	7
0	1	1	0	0	1	8
0	1	1	0	0	1	9
0	1	1	0	0	1	10
0	1	1	0	0	1	11
0	1	1	0	0	1	12
0	1	1	0	0	1	13
0	1	1	0	0	1	14
0	1	1	0	0	1	15
0	1	1	0	0	1	16
0	1	1	0	0	1	17
0	1	1	0	0	1	18
0	1	1	0	0	1	19
0	1	1	0	0	1	20
0	1	1	0	1	1	21
0	1	1	0	1	1	22
0	1	1	0	1	1	23
0	1	1	0	1	1	24
0	1	1	0	1	1	25
0	1	1	0	1	1	26
0	1	1	0	1	1	27
0	1	1	0	1	1	28
0	1	1	0	1	1	29
0	1	1	0	1	1	30
0	1	1	0	1	1	31
0	1	1	0	1	1	32
0	1	1	0	1	1	33
0	1	1	0	1	1	34
0	1	1	0	1	1	35
0	1	1	0	1	1	36
0	1	1	0	1	1	37
0	1	1	0	1	1	38
0	1	1	0	1	1	39
0	1	1	0	1	1	40
0	1	1	0	1	1	41
0	1	1	0	1	1	42
0	1	1	0	1	1	43
0	1	1	0	1	1	44
0	1	1	0	1	1	45
1	1	1	0	1	1	46
0	1	1	0	1	1	47
2	1	1	0	1	1	48
0	1	1	0	1	1	49
0	1	1	0	1	1	50
7	1	1	0	1	1	51
3	1	1	0	1	1	52
0	1	1	0	1	1	53
0	1	1	0	1	1	54
0	1	1	0	1	1	55
0	1	1	0	1	1	56
0	1	1	0	1	1	57
1	1	1	0	1	1	58
0	1	1	0	1	1	59
0	1	0	0	0	2	0
0	1	0	0	0	2	1
0	1	0	0	0	2	2
0	1	0	0	0	2	3
0	1	0	0	0	2	4
0	1	0	0	0	2	5
0	1	0	0	0	2	6
0	1	0	0	0	2	7
0	1	0	0	0	2	8
0	1	0	0	0	2	9
0	1	0	0	0	2	10
0	1	0	0	0	2	11
0	1	0	0	0	2	12
0	1	0	0	0	2	13
1	1	0	0	0	2	14
0	1	0	0	0	2	15
0	1	0	0	0	2	16
0	1	0	0	0	2	17
0	1	0	0	0	2	18
0	1	0	0	0	2	19
0	1	0	0	0	2	20
0	1	0	0	1	2	21
0	1	0	0	1	2	22
1	1	0	0	1	2	23
0	1	0	0	1	2	24
0	1	0	0	1	2	25
0	1	0	0	1	2	26
0	1	0	0	1	2	27
0	1	0	0	1	2	28
0	1	0	0	1	2	29
0	1	0	0	1	2	30
0	1	0	0	1	2	31
1	1	0	0	1	2	32
0	1	0	0	1	2	33
0	1	0	0	1	2	34
0	1	0	0	1	2	35
0	1	0	0	1	2	36
1	1	0	0	1	2	37
0	1	0	0	1	2	38
0	1	0	0	1	2	39
0	1	0	0	1	2	40
0	1	0	0	1	2	41
0	1	0	0	1	2	42
0	1	0	0	1	2	43
0	1	0	0	1	2	44
0	1	0	0	1	2	45
0	1	0	0	1	2	46
0	1	0	0	1	2	47
0	1	0	0	1	2	48
0	1	0	0	1	2	49
0	1	0	0	1	2	50
5	1	0	0	1	2	51
0	1	0	0	1	2	52
0	1	0	0	1	2	53
0	1	0	0	1	2	54
0	1	0	0	1	2	55
0	1	0	0	1	2	56
1	1	0	0	1	2	57
1	1	0	0	1	2	58
0	1	0	0	1	2	59
0	0	0	0	0	3	0
0	0	0	0	0	3	1
0	0	0	0	0	3	2
0	0	0	0	0	3	3
0	0	0	0	0	3	4
0	0	0	0	0	3	5
0	0	0	0	0	3	6
0	0	0	0	0	3	7
0	0	0	0	0	3	8
0	0	0	0	0	3	9
0	0	0	0	0	3	10
0	0	0	0	0	3	11
0	0	0	0	0	3	12
0	0	0	0	0	3	13
0	0	0	0	0	3	14
0	0	0	0	0	3	15
0	0	0	0	0	3	16
0	0	0	0	0	3	17
0	0	0	0	0	3	18
0	0	0	0	0	3	19
0	0	0	0	0	3	20
0	0	0	0	1	3	21
0	0	0	0	1	3	22
0	0	0	0	1	3	23
1	0	0	0	1	3	24
0	0	0	0	1	3	25
0	0	0	0	1	3	26
0	0	0	0	1	3	27
0	0	0	0	1	3	28
0	0	0	0	1	3	29
0	0	0	0	1	3	30
0	0	0	0	1	3	31
0	0	0	0	1	3	32
0	0	0	0	1	3	33
0	0	0	0	1	3	34
0	0	0	0	1	3	35
0	0	0	0	1	3	36
0	0	0	0	1	3	37
0	0	0	0	1	3	38
0	0	0	0	1	3	39
0	0	0	0	1	3	40
0	0	0	0	1	3	41
0	0	0	0	1	3	42
0	0	0	0	1	3	43
0	0	0	0	1	3	44
0	0	0	0	1	3	45
0	0	0	0	1	3	46
0	0	0	0	1	3	47
0	0	0	0	1	3	48
0	0	0	0	1	3	49
0	0	0	0	1	3	50
0	0	0	0	1	3	51
0	0	0	0	1	3	52
0	0	0	0	1	3	53
0	0	0	0	1	3	54
0	0	0	0	1	3	55
0	0	0	0	1	3	56
0	0	0	0	1	3	57
0	0	0	0	1	3	58
0	0	0	0	1	3	59
0	1	0	0	0	4	0
0	1	0	0	0	4	1
0	1	0	0	0	4	2
0	1	0	0	0	4	3
0	1	0	0	0	4	4
0	1	0	0	0	4	5
0	1	0	0	0	4	6
0	1	0	0	0	4	7
0	1	0	0	0	4	8
0	1	0	0	0	4	9
0	1	0	0	0	4	10
0	1	0	0	0	4	11
0	1	0	0	0	4	12
0	1	0	0	0	4	13
0	1	0	0	0	4	14
0	1	0	0	0	4	15
0	1	0	0	0	4	16
1	1	0	0	0	4	17
0	1	0	0	0	4	18
0	1	0	0	0	4	19
0	1	0	0	0	4	20
0	1	0	0	1	4	21
0	1	0	0	1	4	22
0	1	0	0	1	4	23
0	1	0	0	1	4	24
0	1	0	0	1	4	25
0	1	0	0	1	4	26
0	1	0	0	1	4	27
0	1	0	0	1	4	28
0	1	0	0	1	4	29
0	1	0	0	1	4	30
0	1	0	0	1	4	31
0	1	0	0	1	4	32
0	1	0	0	1	4	33
0	1	0	0	1	4	34
0	1	0	0	1	4	35
0	1	0	0	1	4	36
0	1	0	0	1	4	37
0	1	0	0	1	4	38
0	1	0	0	1	4	39
0	1	0	0	1	4	40
0	1	0	0	1	4	41
0	1	0	0	1	4	42
0	1	0	0	1	4	43
0	1	0	0	1	4	44
0	1	0	0	1	4	45
0	1	0	0	1	4	46
0	1	0	0	1	4	47
0	1	0	0	1	4	48
0	1	0	0	1	4	49
0	1	0	0	1	4	50
0	1	0	0	1	4	51
0	1	0	0	1	4	52
0	1	0	0	1	4	53
0	1	0	0	1	4	54
0	1	0	0	1	4	55
0	1	0	0	1	4	56
0	1	0	0	1	4	57
0	1	0	0	1	4	58
0	1	0	0	1	4	59
2	0	0	0	0	5	0
0	0	0	0	0	5	1
0	0	0	0	0	5	2
0	0	0	0	0	5	3
1	0	0	0	0	5	4
1	0	0	0	0	5	5
0	0	0	0	0	5	6
0	0	0	0	0	5	7
0	0	0	0	0	5	8
0	0	0	0	0	5	9
0	0	0	0	0	5	10
0	0	0	0	0	5	11
0	0	0	0	0	5	12
0	0	0	0	0	5	13
0	0	0	0	0	5	14
0	0	0	0	0	5	15
0	0	0	0	0	5	16
0	0	0	0	0	5	17
0	0	0	0	0	5	18
0	0	0	0	0	5	19
0	0	0	0	0	5	20
0	0	0	0	1	5	21
0	0	0	0	1	5	22
0	0	0	0	1	5	23
0	0	0	0	1	5	24
0	0	0	0	1	5	25
1	0	0	0	1	5	26
0	0	0	0	1	5	27
0	0	0	0	1	5	28
0	0	0	0	1	5	29
0	0	0	0	1	5	30
0	0	0	0	1	5	31
0	0	0	0	1	5	32
0	0	0	0	1	5	33
0	0	0	0	1	5	34
0	0	0	0	1	5	35
0	0	0	0	1	5	36
0	0	0	0	1	5	37
0	0	0	0	1	5	38
0	0	0	0	1	5	39
0	0	0	0	1	5	40
0	0	0	0	1	5	41
0	0	0	0	1	5	42
0	0	0	0	1	5	43
0	0	0	0	1	5	44
0	0	0	0	1	5	45
0	0	0	0	1	5	46
0	0	0	0	1	5	47
0	0	0	0	1	5	48
0	0	0	0	1	5	49
0	0	0	0	1	5	50
0	0	0	0	1	5	51
0	0	0	0	1	5	52
0	0	0	0	1	5	53
0	0	0	0	1	5	54
0	0	0	0	1	5	55
0	0	0	0	1	5	56
0	0	0	0	1	5	57
0	0	0	0	1	5	58
0	0	0	0	1	5	59
0	0	0	0	0	6	0
1	0	0	0	0	6	1
0	0	0	0	0	6	2
0	0	0	0	0	6	3
1	0	0	0	0	6	4
0	0	0	0	0	6	5
0	0	0	0	0	6	6
0	0	0	0	0	6	7
0	0	0	0	0	6	8
0	0	0	0	0	6	9
0	0	0	0	0	6	10
0	0	0	0	0	6	11
1	0	0	0	0	6	12
0	0	0	0	0	6	13
0	0	0	0	0	6	14
0	0	0	0	0	6	15
0	0	0	0	0	6	16
0	0	0	0	0	6	17
1	0	0	0	0	6	18
0	0	0	0	0	6	19
0	0	0	0	0	6	20
0	0	0	0	1	6	21
0	0	0	0	1	6	22
0	0	0	0	1	6	23
0	0	0	0	1	6	24
1	0	0	0	1	6	25
0	0	0	0	1	6	26
0	0	0	0	1	6	27
0	0	0	0	1	6	28
0	0	0	0	1	6	29
0	0	0	0	1	6	30
0	0	0	0	1	6	31
0	0	0	0	1	6	32
0	0	0	0	1	6	33
0	0	0	0	1	6	34
0	0	0	0	1	6	35
0	0	0	0	1	6	36
0	0	0	0	1	6	37
0	0	0	0	1	6	38
0	0	0	0	1	6	39
0	0	0	0	1	6	40
0	0	0	0	1	6	41
0	0	0	0	1	6	42
0	0	0	0	1	6	43
0	0	0	0	1	6	44
0	0	0	0	1	6	45
0	0	0	0	1	6	46
0	0	0	0	1	6	47
0	0	0	0	1	6	48
0	0	0	0	1	6	49
0	0	0	0	1	6	50
0	0	0	0	1	6	51
0	0	0	0	1	6	52
0	0	0	0	1	6	53
0	0	0	0	1	6	54
0	0	0	0	1	6	55
0	0	0	0	1	6	56
0	0	0	0	1	6	57
0	0	0	0	1	6	58
0	0	0	0	1	6	59
0	0	0	1	0	7	0
0	0	0	1	0	7	1
0	0	0	1	0	7	2
0	0	0	1	0	7	3
0	0	0	1	0	7	4
1	0	0	1	0	7	5
0	0	0	1	0	7	6
0	0	0	1	0	7	7
0	0	0	1	0	7	8
0	0	0	1	0	7	9
0	0	0	1	0	7	10
0	0	0	1	0	7	11
1	0	0	1	0	7	12
0	0	0	1	0	7	13
0	0	0	1	0	7	14
0	0	0	1	0	7	15
0	0	0	1	0	7	16
0	0	0	1	0	7	17
0	0	0	1	0	7	18
0	0	0	1	0	7	19
0	0	0	1	0	7	20
0	0	0	1	1	7	21
0	0	0	1	1	7	22
0	0	0	1	1	7	23
0	0	0	1	1	7	24
0	0	0	1	1	7	25
0	0	0	1	1	7	26
0	0	0	1	1	7	27
0	0	0	1	1	7	28
0	0	0	1	1	7	29
0	0	0	1	1	7	30
0	0	0	1	1	7	31
0	0	0	1	1	7	32
0	0	0	1	1	7	33
0	0	0	1	1	7	34
0	0	0	1	1	7	35
0	0	0	1	1	7	36
0	0	0	1	1	7	37
0	0	0	1	1	7	38
0	0	0	1	1	7	39
0	0	0	1	1	7	40
0	0	0	1	1	7	41
0	0	0	1	1	7	42
0	0	0	1	1	7	43
0	0	0	1	1	7	44
0	0	0	1	1	7	45
0	0	0	1	1	7	46
0	0	0	1	1	7	47
0	0	0	1	1	7	48
0	0	0	1	1	7	49
0	0	0	1	1	7	50
0	0	0	1	1	7	51
0	0	0	1	1	7	52
0	0	0	1	1	7	53
0	0	0	1	1	7	54
0	0	0	1	1	7	55
0	0	0	1	1	7	56
0	0	0	1	1	7	57
0	0	0	1	1	7	58
0	0	0	1	1	7	59
0	0	0	1	0	8	0
0	0	0	1	0	8	1
0	0	0	1	0	8	2
0	0	0	1	0	8	3
0	0	0	1	0	8	4
0	0	0	1	0	8	5
0	0	0	1	0	8	6
0	0	0	1	0	8	7
0	0	0	1	0	8	8
0	0	0	1	0	8	9
0	0	0	1	0	8	10
0	0	0	1	0	8	11
0	0	0	1	0	8	12
0	0	0	1	0	8	13
0	0	0	1	0	8	14
0	0	0	1	0	8	15
0	0	0	1	0	8	16
0	0	0	1	0	8	17
0	0	0	1	0	8	18
0	0	0	1	0	8	19
0	0	0	1	0	8	20
0	0	0	1	1	8	21
0	0	0	1	1	8	22
0	0	0	1	1	8	23
0	0	0	1	1	8	24
0	0	0	1	1	8	25
0	0	0	1	1	8	26
0	0	0	1	1	8	27
0	0	0	1	1	8	28
0	0	0	1	1	8	29
0	0	0	1	1	8	30
0	0	0	1	1	8	31
0	0	0	1	1	8	32
0	0	0	1	1	8	33
0	0	0	1	1	8	34
0	0	0	1	1	8	35
0	0	0	1	1	8	36
0	0	0	1	1	8	37
0	0	0	1	1	8	38
0	0	0	1	1	8	39
0	0	0	1	1	8	40
0	0	0	1	1	8	41
0	0	0	1	1	8	42
0	0	0	1	1	8	43
0	0	0	1	1	8	44
0	0	0	1	1	8	45
0	0	0	1	1	8	46
0	0	0	1	1	8	47
0	0	0	1	1	8	48
0	0	0	1	1	8	49
0	0	0	1	1	8	50
0	0	0	1	1	8	51
0	0	0	1	1	8	52
0	0	0	1	1	8	53
0	0	0	1	1	8	54
0	0	0	1	1	8	55
0	0	0	1	1	8	56
0	0	0	1	1	8	57
0	0	0	1	1	8	58
0	0	0	1	1	8	59
